# Supplementary material
Source: ML conference proceedings conference paper supplement (https://openaccess.thecvf.com/content/CVPR2023/html/Yin_Multi-Space_Neural_Radiance_CVPR_2023_paper.html)
Supplement: Supplementary file 1 [file Yin_Multi-Space_Neural_Radiance_CVPR_2023_supplemental.pdf]

# Supplementary Materials for Multi-Space Neural Radiance Fields

Ze-Xin Yin    Jiaxiong Qiu    Ming-Ming Cheng    Bo Ren\*

VCIP, CS, Nankai University

{Zexin.Yin.cn, qiujiaxiong727}@gmail.com, {cmm, rb}@nankai.edu.cn

## 1. Detailed networks and experiment settings

### 1.1. Network architecture

As illustrated in Fig. 1, we show the difference between our networks and the NeRF backbone network. NeRF [9], Mip-NeRF [1], and the ‘NeRF MLP’ of Mip-NeRF 360 [2] all share the same architecture except the width of fully-connected layers as shown in Fig. 1a. For NeRF and Mip-NeRF, the hyperparameters for layer width are  $\{w_1 = 256, w_2 = 256, w_3 = 128\}$ , and for Mip-NeRF 360 they are  $\{w_1 = 1024, w_2 = 256, w_3 = 128\}$ . We use  $\gamma(\cdot)$  to uniformly represent the positional encoding function, as we only modify the output part of the networks and the positional encoding follows the original methods. Please refer to the original papers for more details about the positional encoding function.

As in Fig. 1b, we only change the output part of NeRF backbones. For the density branch that outputs a single density  $\sigma$ , we replace it with one that outputs  $K$  densities  $\{\sigma^k\}$ . And for the color branch that outputs a single color vector  $c$ , we replace it with one that outputs  $K$  feature vectors  $\{f^k\}$  of dimension  $d$ .  $K$  and  $d$  are hyperparameters for the number of sub-spaces and the dimension of the feature fields, respectively. Besides, we change the activation function of the color branch from Sigmoid to ReLU.

Most NeRF-based methods use volumetric rendering to accumulate the color  $c$  and the density  $\sigma$  along the ray to get the estimated color  $C$  for each pixel. Instead, we perform volumetric rendering for each pair of densities  $\{\sigma^k\}$  and features  $\{f^k\}$  along the ray and get  $K$  accumulated features  $\{\mathcal{F}^k\}$ . Then we use two additional simple MLPs to decode and compose the final RGB information. As in Fig. 1c, the MLPs consist of two fully-connected layers with widths  $d$  and  $h$ . The Gate MLP uses the Softmax activation function to get the composition weights  $\{w^k\}$ , while the Decoder MLP uses the Sigmoid activation function to get the colors  $\{C^k\}$  of each sub-space.

As illustrated above, our multi-space module consists

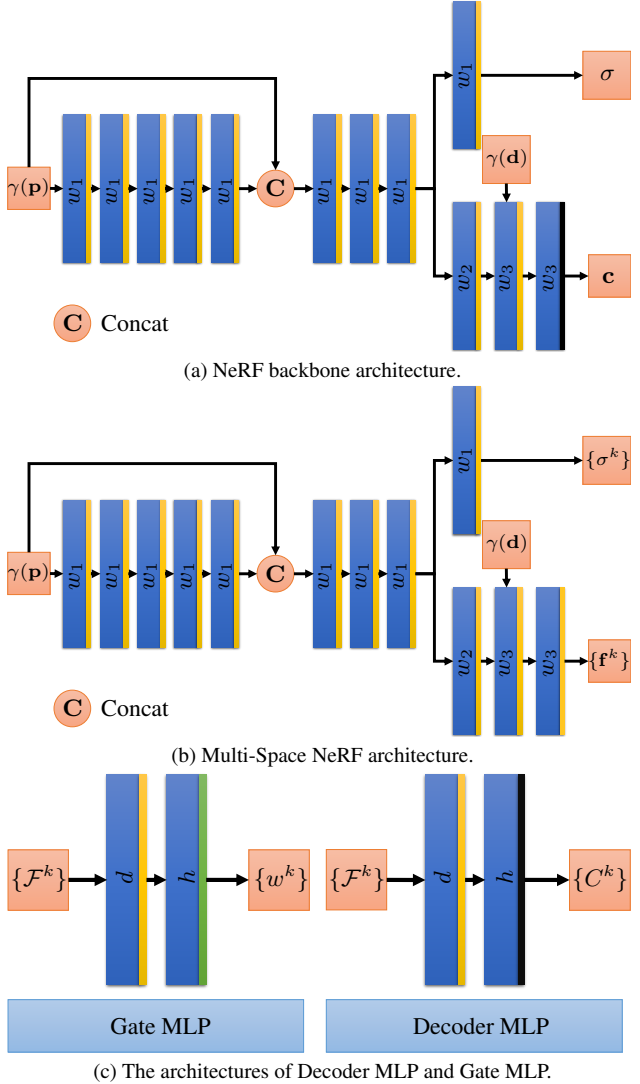

Figure 1. NeRF backbone architecture and our model architectures. We denote fully-connected layers as the blue layers in the figure. We use different colors to represent different activation functions, *i.e.*, yellow for ReLU, green for Sigmoid, and black for Softmax.

\*Bo Ren is the corresponding author.

of two simple MLPs and the output part of NeRF backbones. Thus we can scale our module with hyperparameters  $\{K, d, h\}$ . For NeRF and Mip-NeRF related experiments, we construct MS-NeRF<sub>S</sub> and MS-Mip-NeRF<sub>S</sub> with  $\{K = 6, d = 24, h = 24\}$ ; similarly, MS-NeRF<sub>M</sub> and MS-Mip-NeRF<sub>M</sub> with  $\{K = 6, d = 48, h = 48\}$ , and MS-NeRF<sub>B</sub> and MS-Mip-NeRF<sub>B</sub> with  $\{K = 8, d = 64, h = 64\}$ . Besides, we construct MS-Mip-NeRF 360 with  $\{K = 8, d = 32, h = 64\}$ . To fairly compare with NeRFReN [5], we also construct MS-NeRF<sub>T</sub> with  $\{K = 2, d = 128, h = 128\}$  based on NeRF.

**Details about the importance sampling.** To aggregate colors  $\{c_i\}$  along the rays using densities  $\{\sigma_i\}$ , NeRF-based methods calculate the contribution of each point to the estimated pixel color as follows:

$$I_i = T_i(1 - \exp(-\sigma_i \delta_i)) \quad (1)$$

where  $T_i = \exp(-\sum_{j=1}^{i-1} \sigma_j \delta_j)$ ,  $\delta_i = t_i - t_{i-1}$ , and  $t_i$  represents the distance between the camera and the  $i$ -th sample point. Most NeRF-based methods require importance sampling along the rays where there are higher color contributions  $I_i$  accumulated. However, in our implementation, there are  $K$  parallel color contributions  $\{I_i^k\}$  at each sample point. To perform the importance sampling, we use the weights  $\{w^k\}$  of each sub-space to aggregate color contributions at each point as the one for the importance sampling, which is:

$$I_i = \sum_{j=1}^K w_i^j I_i^j \quad (2)$$

## 1.2. Training details

**NeRF-based experiments.** We follow the original settings from [9] with a few changes. We re-implement NeRF using PyTorch [11] and PyTorch Lightning [4] and borrow some code from [15]. We use the Adam optimizer [6] and exponentially decay the learning rate from  $5e-4$  to  $7e-5$  with  $\beta_1 = 0.9, \beta_2 = 0.999$ , and  $\epsilon = 1e-8$ . For all scenes and all experiments, we use 1024 rays per batch, and train  $2e5$  iterations with  $N_c = 64$  sampled points for the coarse network and  $N_f = 128$  sampled points for the fine network.

**Mip-NeRF-based and Mip-NeRF 360-based experiments.** We implement our Mip-NeRF [1] based methods on top of the official implementation<sup>1</sup> and implement our Mip-NeRF 360 [2] based method on top of [10]. We follow most training settings, except that we train  $2e5$  iterations with a batch of 1024 rays.

**Ref-NeRF.** We also use the official code [10] to train Ref-NeRF [13], and similarly, we follow most default settings, except  $2e5$  iterations and a batch size of 1024 for training.

<sup>1</sup><https://github.com/google/mipnerf>

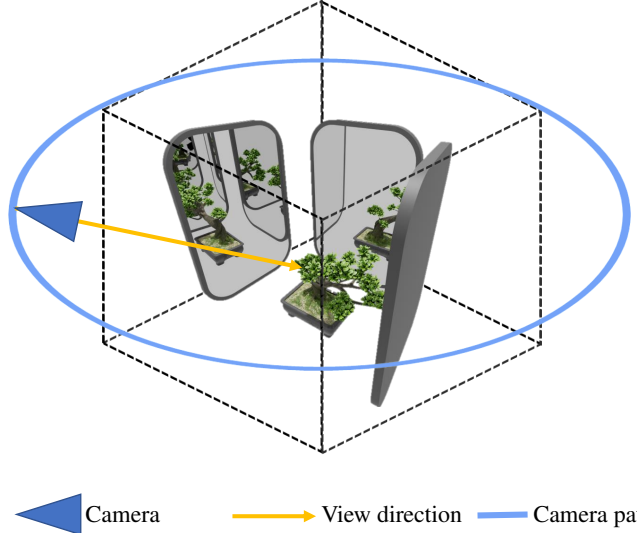

Figure 2. Illustration of the camera path in our synthetic dataset.

**NeRFReN.** We compare our NeRF-based variant MS-NeRF<sub>T</sub> with NeRFReN [5] on the RFFR dataset, and we re-train this method using the official code<sup>2</sup>. Similarly, we follow most provided settings, except that the number of used masks for reflective surfaces is zero for fair comparisons, as our methods require no masks.

## 1.3. Evaluation Protocols

We use PSNR, SSIM [14], and LPIPS [16] with the backbone of AlexNet [7] for quantitative comparisons. For the synthetic dataset, we evaluate the methods on the test set. For the real captured dataset, we sort all images by the names according to alphabet order and use every 1 of 8 images as the test images, as done in [8].

## 2. Additional details of our proposed dataset

### 2.1. Synthetic part

We use 3D models from BlenderKit<sup>3</sup>, a community for sharing 3D models, textures, and others for 3D artworks, to create scenes for the synthetic dataset. We use the physically-based path tracer of Blender [3], Cycles, to render all the scenes, and we fix the height of the camera and move it around the circle in the scene. We make the camera look at the central objects and uniformly sample 120 view-points on the circle to render images as illustrated in Fig. 2, all at the resolution of  $800 \times 800$ . We randomly select 100 of the 120 images as the training images, 10 as the validation images, and 10 as the test images. As in Fig. 5, we visualize a few images for each scene. In most scenes, there are more than one mirrors that construct complex light paths, and we also introduce refractive and transparent materials.

<sup>2</sup><https://github.com/bennyguo/nerfren>

<sup>3</sup><https://www.blenderkit.com/>

## 2.2. Real captured part

We capture the real dataset using a Sony Alpha 6400 APS-C camera with a fixed 30mm lens. We fix the ISO, shutter speed, aperture size, and focus. We choose views carefully to avoid the appearance of the camera and the authors on the reflective surfaces. We use a few toys, books, two mirrors, a glass ball with a smooth surface, a glass ball with a diamond-like surface, and common furniture to construct our scenes, as shown in Fig. 6. Our scenes consist of 46 to 107 images, all at the resolution of  $6000 \times 4000$ , and the viewpoints are randomly split around the central objects. We use COLMAP [12] to estimate the camera poses and use every 1 of 8 images as the test set, and we downsample all images by a factor of 8 for training and evaluation. To demonstrate the different distribution of camera poses from our real captured dataset and the RFFR dataset, we visualize the poses of the scene 'Scan05' in our dataset and the scene 'mirror' in RFFR dataset in Fig. 3.

## 3. Additional experiment results

**Results on our synthetic dataset.** We report the detailed performance of our methods on each scene in our synthetic dataset using PSNR and SSIM, as in Tab. 1. And we also visualize one test view for each scene in Fig. 7a, Fig. 7b, and Fig. 7c. Our methods leverage the performance of NeRF-based methods by a large margin in reflection-related scenes, and in most scenes with merely refractions, our methods also improve the performance.

**Results on our real captured dataset.** We report the detailed performance of MS-Mip-NeRF 360 and Mip-NeRF 360 on each scene in our real captured dataset using PSNR and SSIM, as in Tab. 2. And we also present 1~2 test view(s) for each scene, as in Fig. 8a and Fig. 8b. The qualitative and quantitative results both demonstrate that our method can handle mirror-like objects in the real world.

**Results on RFFR dataset.** We report the detailed performance of MS-NeRF<sub>T</sub> and NeRFReN on each scene in the RFFR dataset using PSNR and SSIM, as in Tab. 3. The results show that even for forward-facing scenes with mirrors, NeRFReN heavily relies on masks to guide the model, while our method performs stably in both 360-degree and forward-facing scenes.

**Results on Realistic Synthetic 360° dataset and Real Forward-Facing dataset.** The Realistic Synthetic 360° dataset and Real Forward-Facing dataset are first introduced in [9], which are commonly used for evaluating the ability of NeRF-based methods in novel view synthesis. We train Mip-NeRF and MS-Mip-NeRF<sub>B</sub> on these datasets because Mip-NeRF is a commonly used backbone for NeRF-based method. The results are reported in Tab. 4, which demonstrate that our multi-space module has no influence on the representation ability of NeRF-based methods on

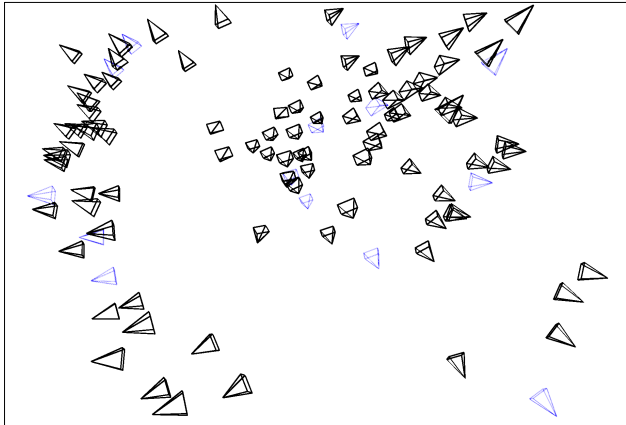

(a) Camera poses of the scene 'Scan05' in our dataset.

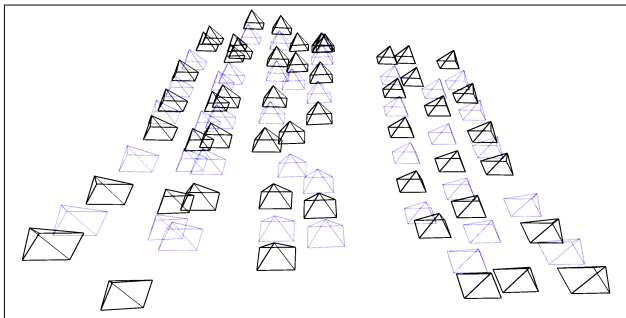

(b) Camera poses of the scene 'mirror' in the RFFR dataset.

Figure 3. Visualization of the camera poses in our real captured dataset and in the RFFR dataset. We draw training views in black and test views in blue.

common materials. Note that we only train Mip-NeRF and MS-Mip-NeRF<sub>B</sub> with a batch size of 1024 for  $2e5$  iterations, while in the original paper, Mip-NeRF is trained for  $1e6$  iterations with a batch size of 4096. Therefore, our reported results are slower. Besides, under such settings, the models can already render satisfactory results, as in Fig. 4.

## 4. Limitations and future works

Our methods leverage the performance of NeRF-based models on reflective surfaces by a large margin in an explainable way. However, to help NeRF-based methods better understand our 3D scenes, there need some constraints to help the network discriminate the virtual images from the real scenes. By now, our methods treat everything in the scenes equally.

Besides, refractive surfaces are often related to irregular shapes. Thus, the created virtual images are often distorted. Although our method is helpful in such circumstances, it fails to understand the curved light path caused by refraction. Therefore, to further improve the performance on refractive surfaces, a possible way is to introduce non-linear sub-spaces and model the distorted virtual images in them.

| Scene   | NeRF  |       | MS-NeRF <sub>B</sub> |       | Mip-NeRF |       | Ref-NeRF |       | MS-Mip-NeRF <sub>B</sub> |       | Mip-NeRF 360 |       | MS-Mip-NeRF 360 |       |
|---------|-------|-------|----------------------|-------|----------|-------|----------|-------|--------------------------|-------|--------------|-------|-----------------|-------|
|         | PSNR↑ | SSIM↑ | PSNR↑                | SSIM↑ | PSNR↑    | SSIM↑ | PSNR↑    | SSIM↑ | PSNR↑                    | SSIM↑ | PSNR↑        | SSIM↑ | PSNR↑           | SSIM↑ |
| Scene01 | 33.48 | 0.950 | 37.75                | 0.967 | 34.05    | 0.955 | 36.23    | 0.961 | 39.57                    | 0.973 | 34.23        | 0.963 | 41.47           | 0.982 |
| Scene02 | 33.21 | 0.956 | 37.06                | 0.967 | 33.54    | 0.960 | 36.47    | 0.966 | 38.84                    | 0.974 | 33.72        | 0.966 | 41.69           | 0.983 |
| Scene03 | 36.59 | 0.966 | 38.54                | 0.970 | 37.68    | 0.970 | 38.96    | 0.971 | 41.17                    | 0.977 | 38.74        | 0.977 | 42.63           | 0.983 |
| Scene04 | 30.41 | 0.934 | 35.71                | 0.961 | 30.50    | 0.939 | 32.70    | 0.947 | 36.88                    | 0.968 | 29.84        | 0.942 | 38.84           | 0.977 |
| Scene05 | 27.52 | 0.914 | 32.85                | 0.951 | 28.57    | 0.918 | 28.53    | 0.924 | 33.73                    | 0.959 | 26.79        | 0.917 | 35.37           | 0.969 |
| Scene06 | 34.37 | 0.937 | 38.90                | 0.950 | 35.31    | 0.940 | 37.50    | 0.950 | 39.60                    | 0.953 | 35.38        | 0.958 | 41.89           | 0.973 |
| Scene07 | 32.41 | 0.839 | 32.43                | 0.838 | 32.73    | 0.845 | 33.01    | 0.847 | 32.91                    | 0.845 | 33.78        | 0.885 | 34.07           | 0.887 |
| Scene08 | 26.78 | 0.870 | 28.27                | 0.893 | 27.11    | 0.879 | 29.13    | 0.899 | 30.09                    | 0.909 | 28.30        | 0.936 | 29.80           | 0.943 |
| Scene09 | 32.08 | 0.890 | 32.63                | 0.895 | 32.73    | 0.900 | 32.79    | 0.898 | 33.22                    | 0.902 | 33.20        | 0.907 | 32.40           | 0.898 |
| Scene10 | 39.04 | 0.968 | 40.87                | 0.976 | 39.34    | 0.972 | 38.78    | 0.965 | 41.66                    | 0.979 | 39.77        | 0.974 | 43.06           | 0.983 |
| Scene11 | 28.29 | 0.790 | 28.56                | 0.791 | 28.57    | 0.797 | 29.86    | 0.808 | 31.60                    | 0.820 | 28.91        | 0.842 | 32.20           | 0.853 |
| Scene12 | 31.20 | 0.936 | 35.75                | 0.961 | 31.53    | 0.942 | 32.97    | 0.946 | 36.98                    | 0.969 | 30.76        | 0.944 | 37.77           | 0.972 |
| Scene13 | 26.04 | 0.630 | 25.97                | 0.620 | 26.16    | 0.658 | 26.03    | 0.644 | 26.21                    | 0.660 | 25.92        | 0.663 | 25.74           | 0.617 |
| Scene14 | 24.61 | 0.766 | 25.54                | 0.785 | 24.79    | 0.776 | 26.47    | 0.804 | 26.06                    | 0.802 | 25.99        | 0.852 | 28.72           | 0.884 |
| Scene15 | 25.10 | 0.740 | 25.25                | 0.737 | 25.53    | 0.754 | 26.00    | 0.777 | 25.68                    | 0.754 | 25.55        | 0.786 | 25.43           | 0.762 |
| Scene16 | 31.56 | 0.897 | 34.21                | 0.913 | 32.12    | 0.906 | 33.96    | 0.917 | 35.38                    | 0.920 | 32.39        | 0.926 | 37.38           | 0.938 |
| Scene17 | 25.20 | 0.776 | 25.64                | 0.775 | 25.47    | 0.794 | 25.89    | 0.811 | 25.54                    | 0.785 | 24.48        | 0.799 | 25.28           | 0.783 |
| Scene18 | 33.36 | 0.927 | 33.53                | 0.927 | 33.68    | 0.935 | 34.58    | 0.938 | 34.11                    | 0.936 | 34.38        | 0.950 | 35.37           | 0.953 |
| Scene19 | 22.86 | 0.752 | 23.86                | 0.769 | 22.83    | 0.764 | 23.72    | 0.771 | 24.35                    | 0.789 | 24.64        | 0.836 | 26.87           | 0.860 |
| Scene20 | 37.13 | 0.941 | 38.41                | 0.942 | 38.06    | 0.944 | 38.64    | 0.951 | 40.01                    | 0.950 | 38.51        | 0.967 | 42.00           | 0.974 |
| Scene21 | 26.51 | 0.641 | 26.63                | 0.638 | 26.95    | 0.653 | 27.41    | 0.666 | 27.33                    | 0.658 | 28.06        | 0.704 | 28.41           | 0.710 |
| Scene22 | 28.80 | 0.830 | 30.09                | 0.866 | 29.49    | 0.850 | 30.40    | 0.872 | 31.33                    | 0.895 | 28.79        | 0.833 | 31.22           | 0.891 |
| Scene23 | 35.53 | 0.942 | 39.08                | 0.952 | 38.31    | 0.949 | 38.65    | 0.952 | 39.87                    | 0.954 | 36.64        | 0.957 | 40.46           | 0.963 |
| Scene24 | 32.10 | 0.898 | 34.43                | 0.909 | 32.64    | 0.904 | 34.03    | 0.911 | 35.81                    | 0.919 | 32.14        | 0.912 | 36.09           | 0.930 |
| Scene25 | 36.37 | 0.948 | 37.16                | 0.947 | 37.86    | 0.954 | 36.57    | 0.946 | 39.63                    | 0.955 | 38.60        | 0.973 | 41.96           | 0.976 |

Table 1. Detailed PSNR and SSIM of each scene in our synthetic dataset.

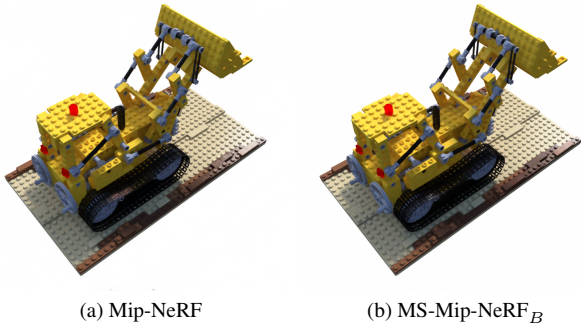

Figure 4. A test view from Mip-NeRF and MS-Mip-NeRF<sub>B</sub> in scene 'lego' from the Realistic Synthetic 360° dataset.

| Scene  | Mip-NeRF 360 |       | MS-Mip-NeRF 360 |       |
|--------|--------------|-------|-----------------|-------|
|        | PSNR↑        | SSIM↑ | PSNR↑           | SSIM↑ |
| Scan01 | 27.87        | 0.917 | 30.84           | 0.919 |
| Scan02 | 27.88        | 0.905 | 28.82           | 0.903 |
| Scan03 | 27.86        | 0.898 | 29.48           | 0.901 |
| Scan04 | 24.41        | 0.846 | 26.27           | 0.861 |
| Scan05 | 27.26        | 0.911 | 27.60           | 0.907 |
| Scan06 | 24.82        | 0.844 | 26.46           | 0.847 |
| Scan07 | 26.77        | 0.904 | 27.50           | 0.899 |

Table 2. Detailed PSNR and SSIM of each scene in our real captured dataset.

| Scene    | NeRFReN |       | MS-NeRF <sub>T</sub> |       |
|----------|---------|-------|----------------------|-------|
|          | PSNR↑   | SSIM↑ | PSNR↑                | SSIM↑ |
| art1     | 39.03   | 0.978 | 37.51                | 0.975 |
| art2     | 41.91   | 0.970 | 41.87                | 0.970 |
| art3     | 40.62   | 0.969 | 40.92                | 0.970 |
| bookcase | 30.26   | 0.890 | 29.80                | 0.885 |
| tv       | 32.96   | 0.953 | 32.81                | 0.956 |
| mirror   | 26.81   | 0.878 | 32.68                | 0.936 |

Table 3. Detailed PSNR and SSIM of each scene in the RFFR dataset [5].

| dataset                  | Mip-NeRF |       | MS-Mip-NeRF <sub>B</sub> |       |
|--------------------------|----------|-------|--------------------------|-------|
|                          | PSNR↑    | SSIM↑ | PSNR↑                    | SSIM↑ |
| Realistic Synthetic 360° | 30.74    | 0.942 | 30.81                    | 0.943 |
| Real Forward-Facing      | 25.78    | 0.775 | 25.59                    | 0.764 |

Table 4. Results on the Realistic Synthetic 360° dataset and Real Forward-Facing dataset.

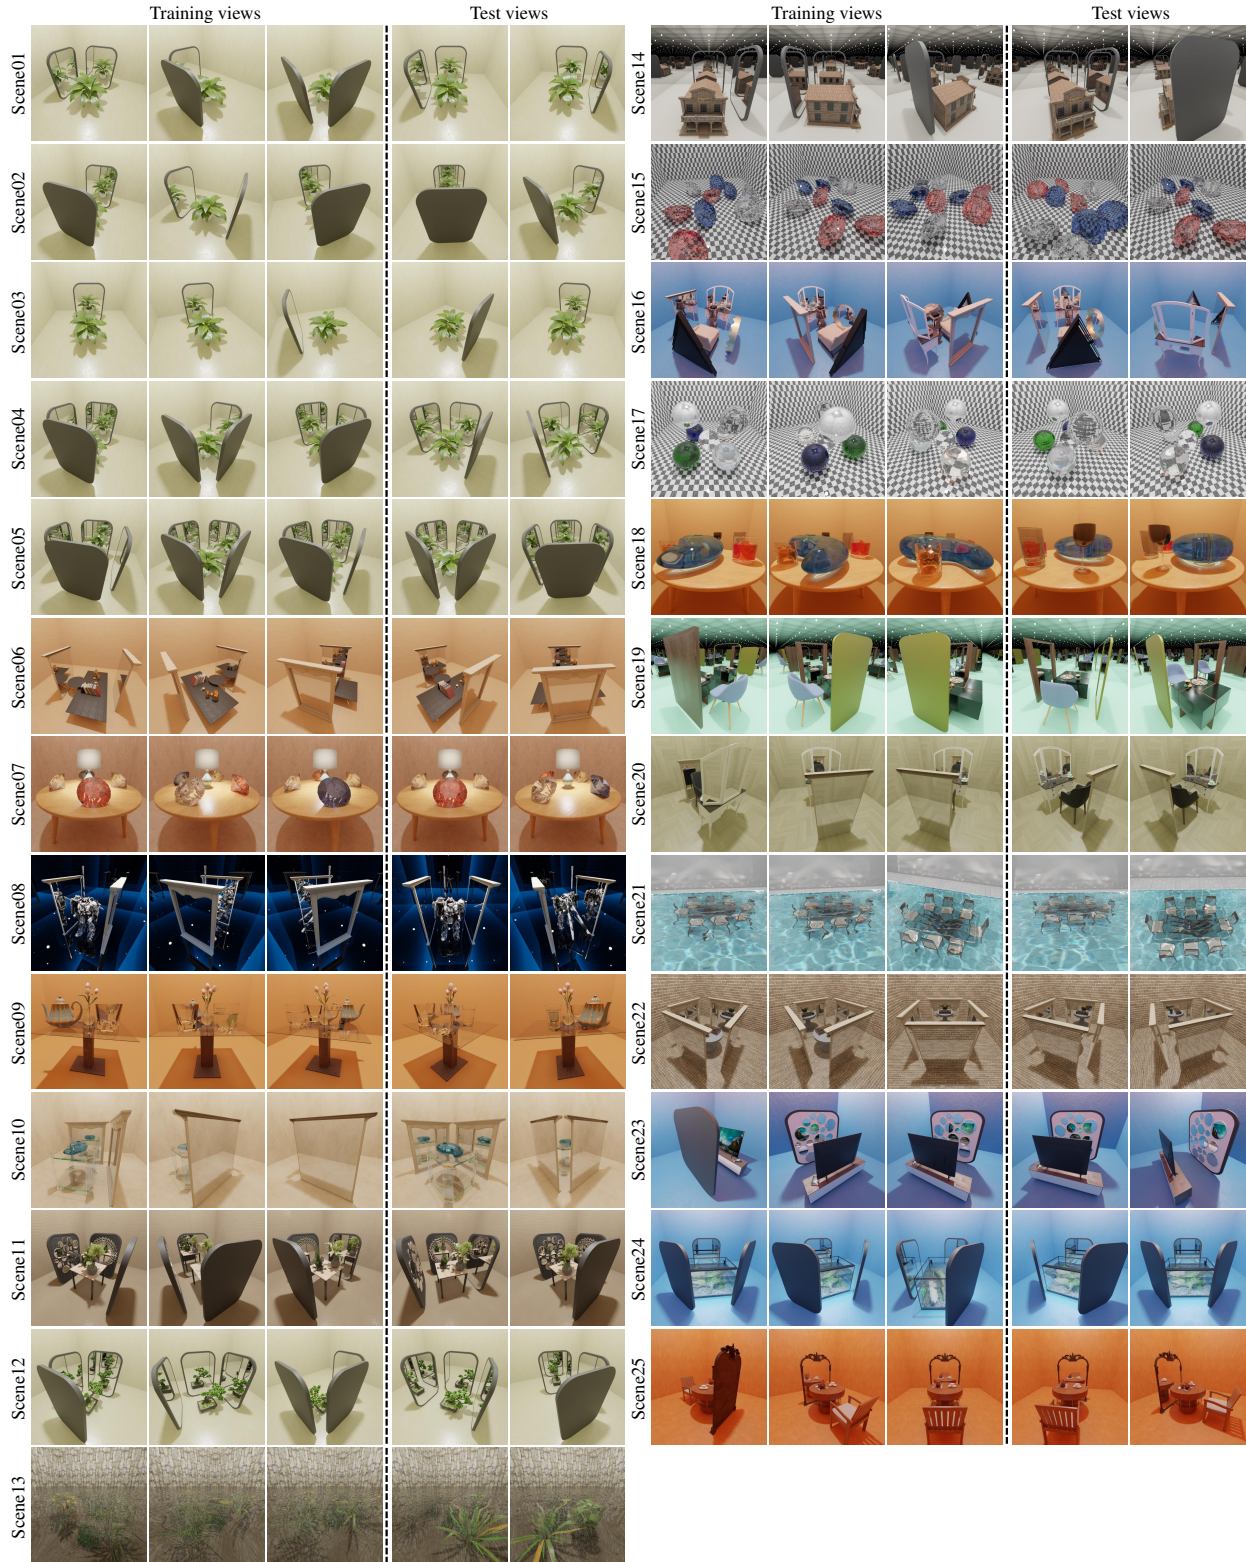

Figure 5. We randomly visualize three training views and two test views for each scene in our synthetic dataset. In Scene01~Scene05, we only change the layout and the number of the mirror(s), which can be treated as the basic part of our synthetic dataset; therefore, researchers can conduct preliminary experiments on them.

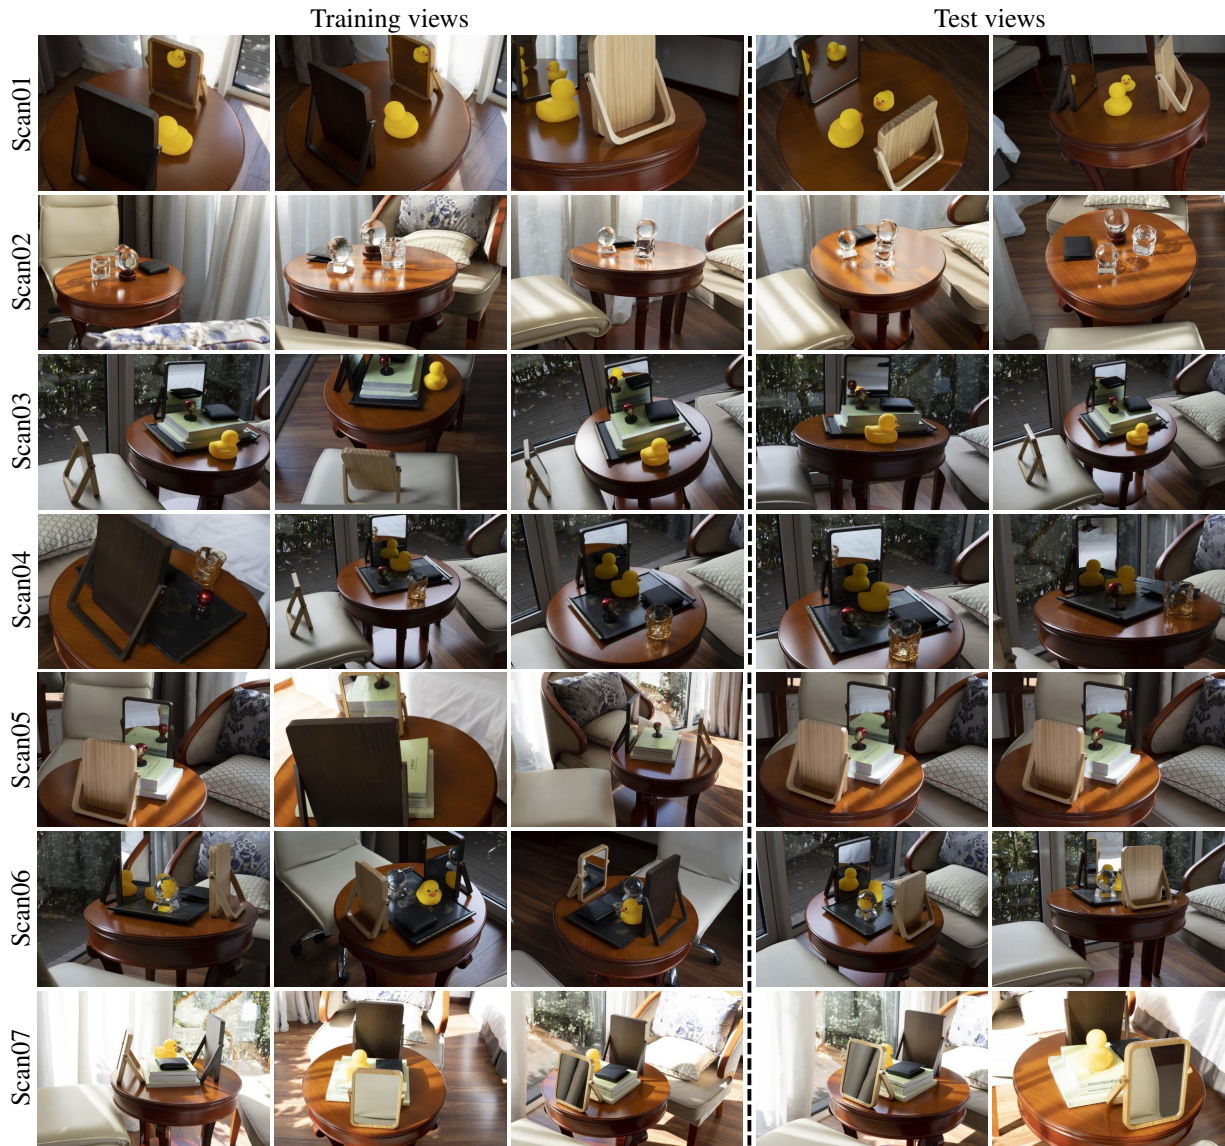

Figure 6. We randomly visualize three training views and two test views for each scene in our real captured dataset.

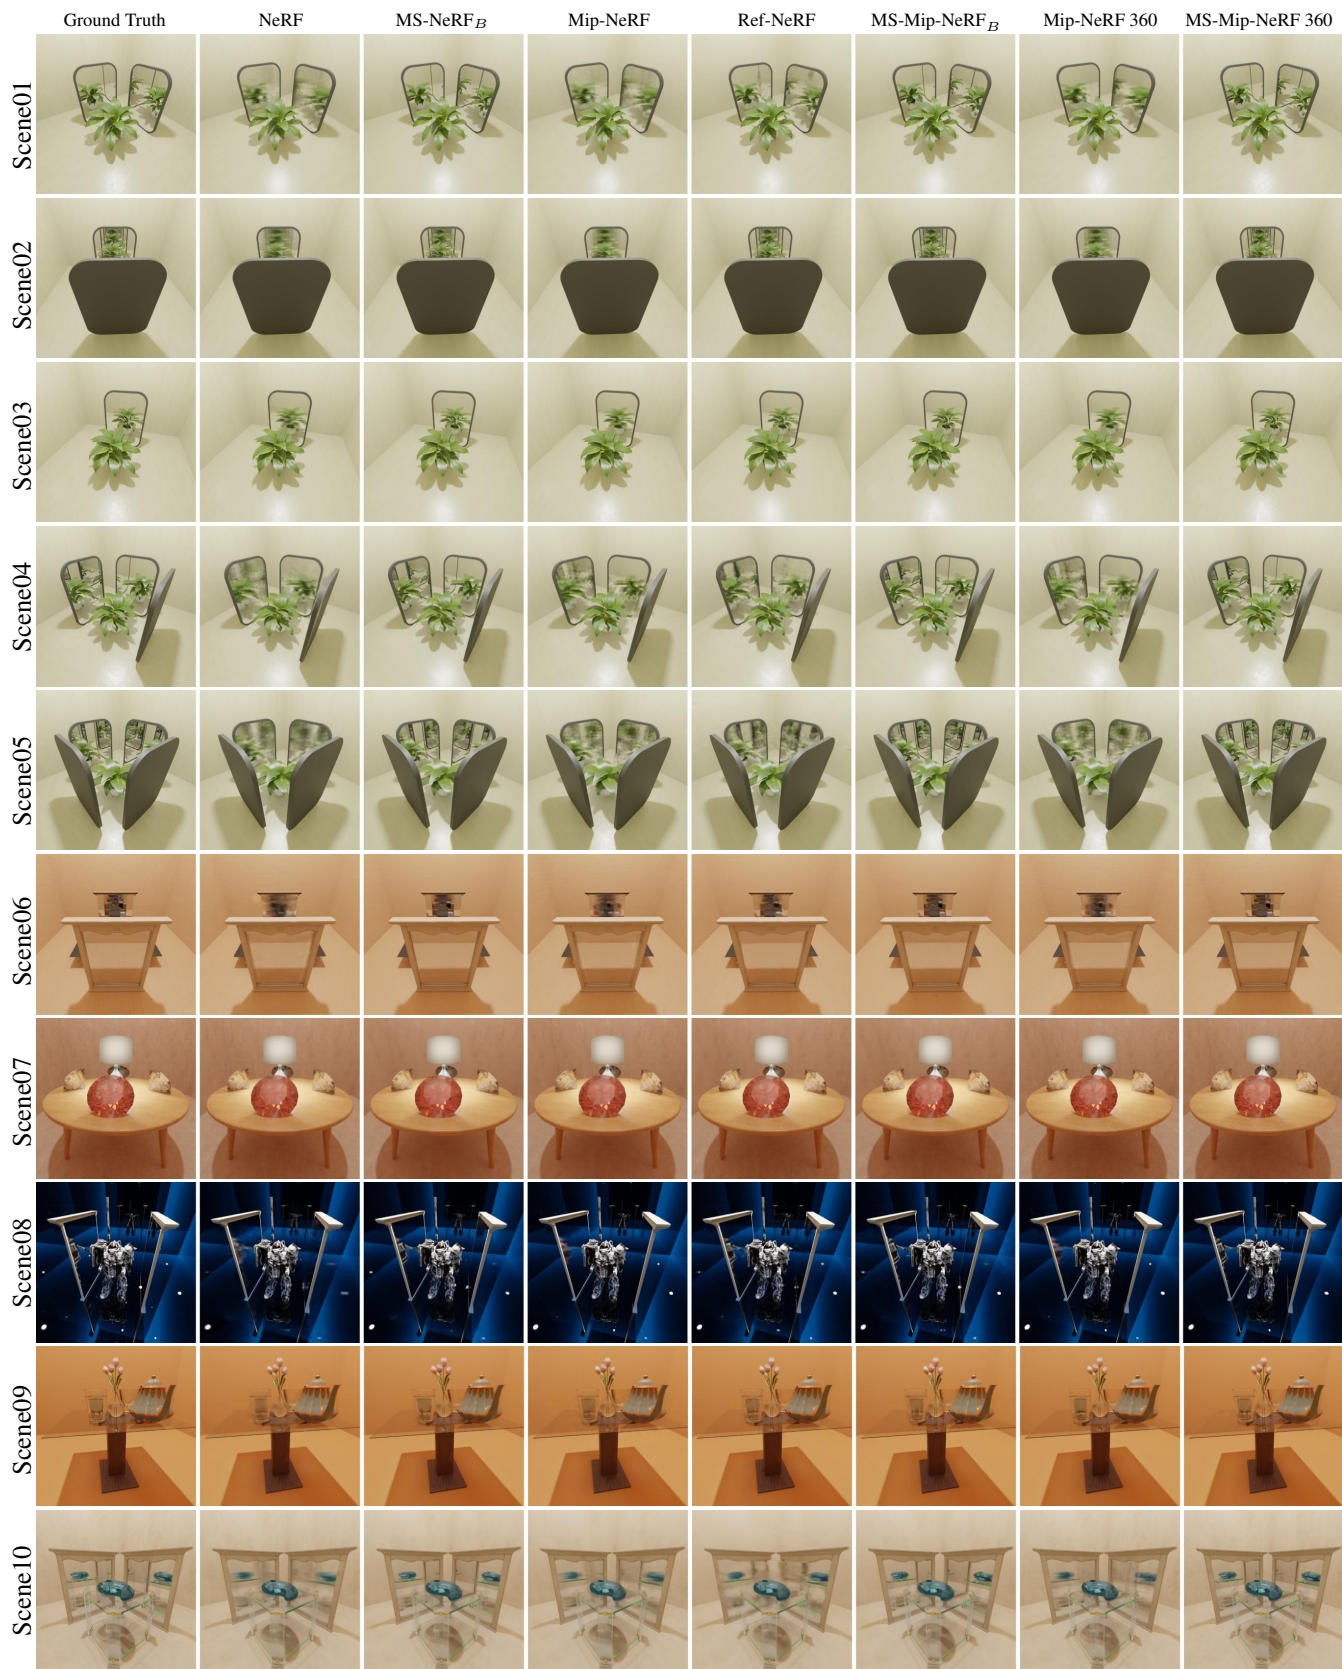

(a) Visual comparisons on Scene01~Scene10. Please zoom in to see the details.

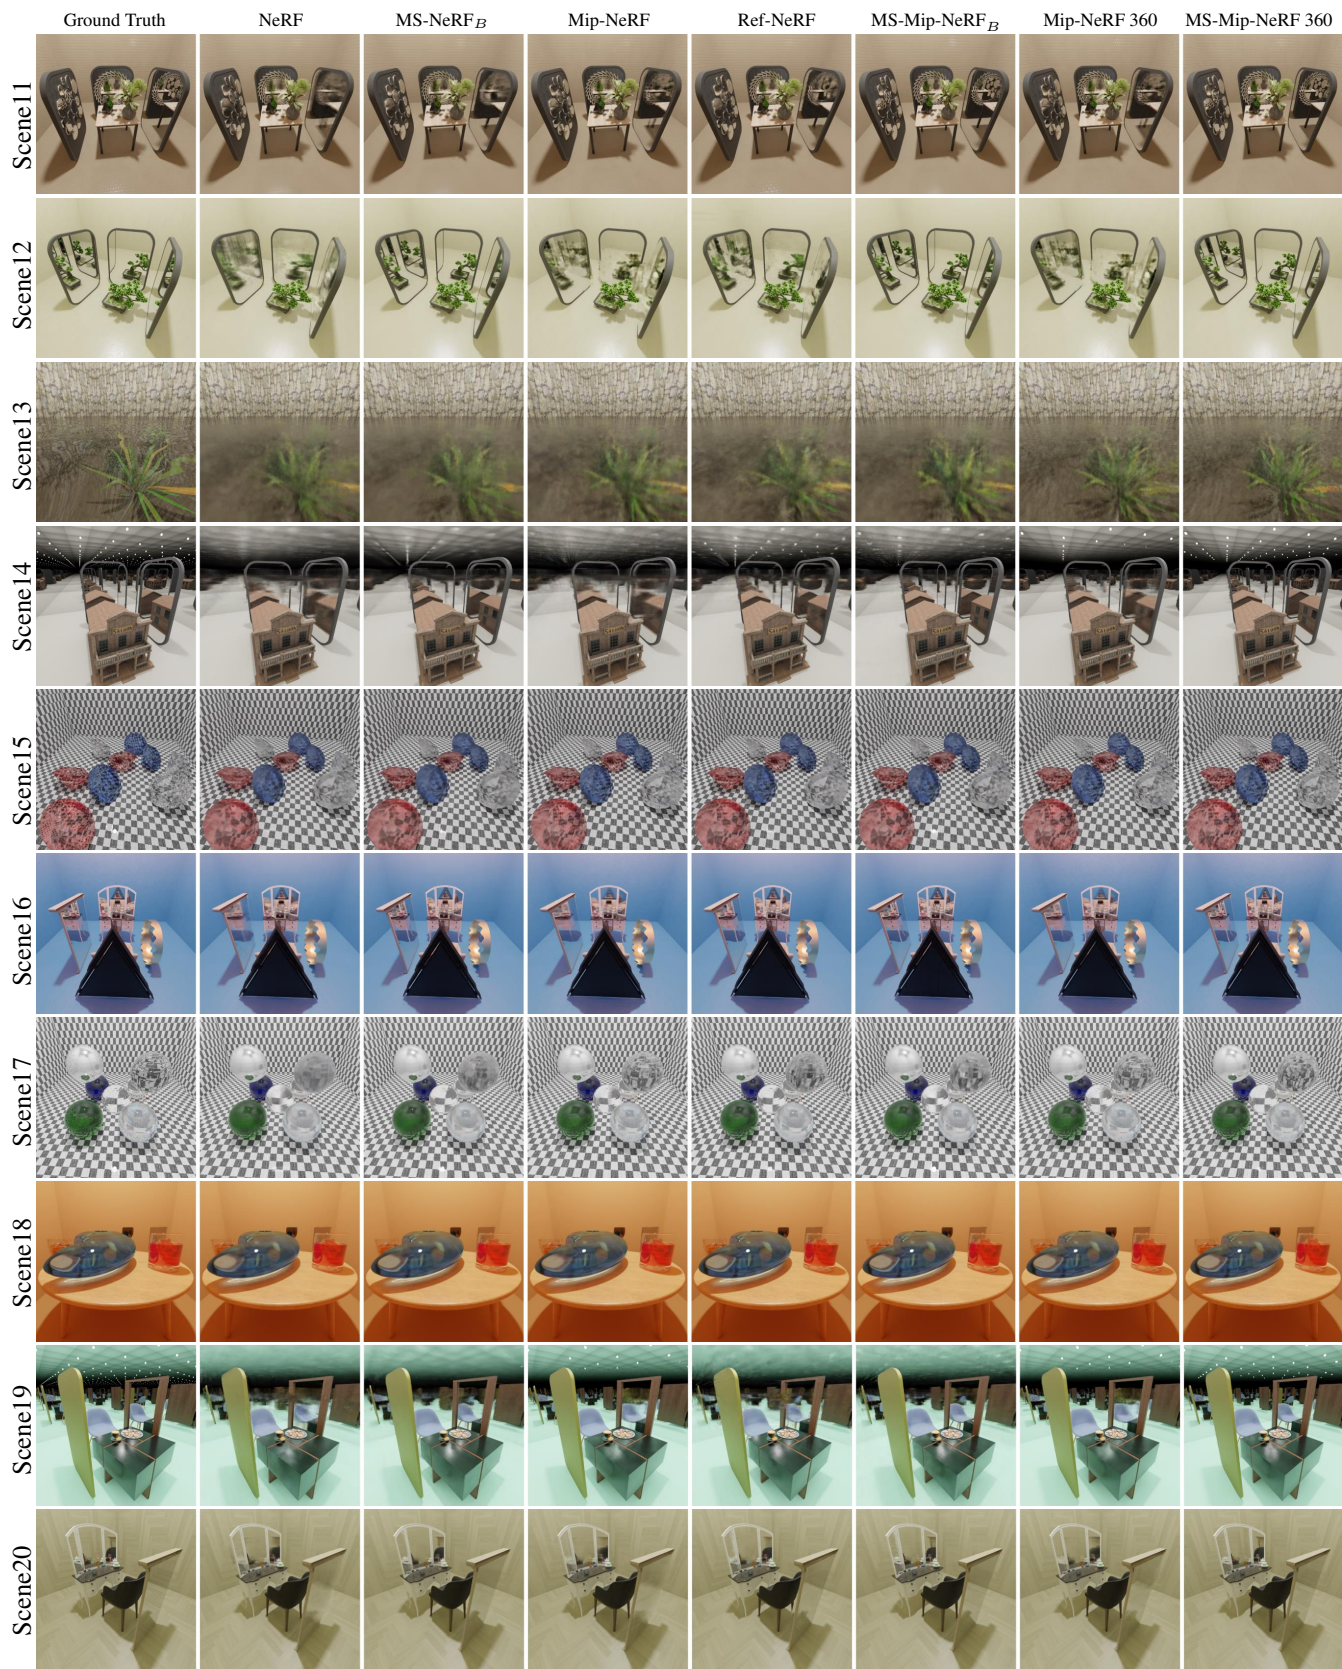

(b) Visual comparisons on Scene11~Scene20. Please zoom in to see the details.



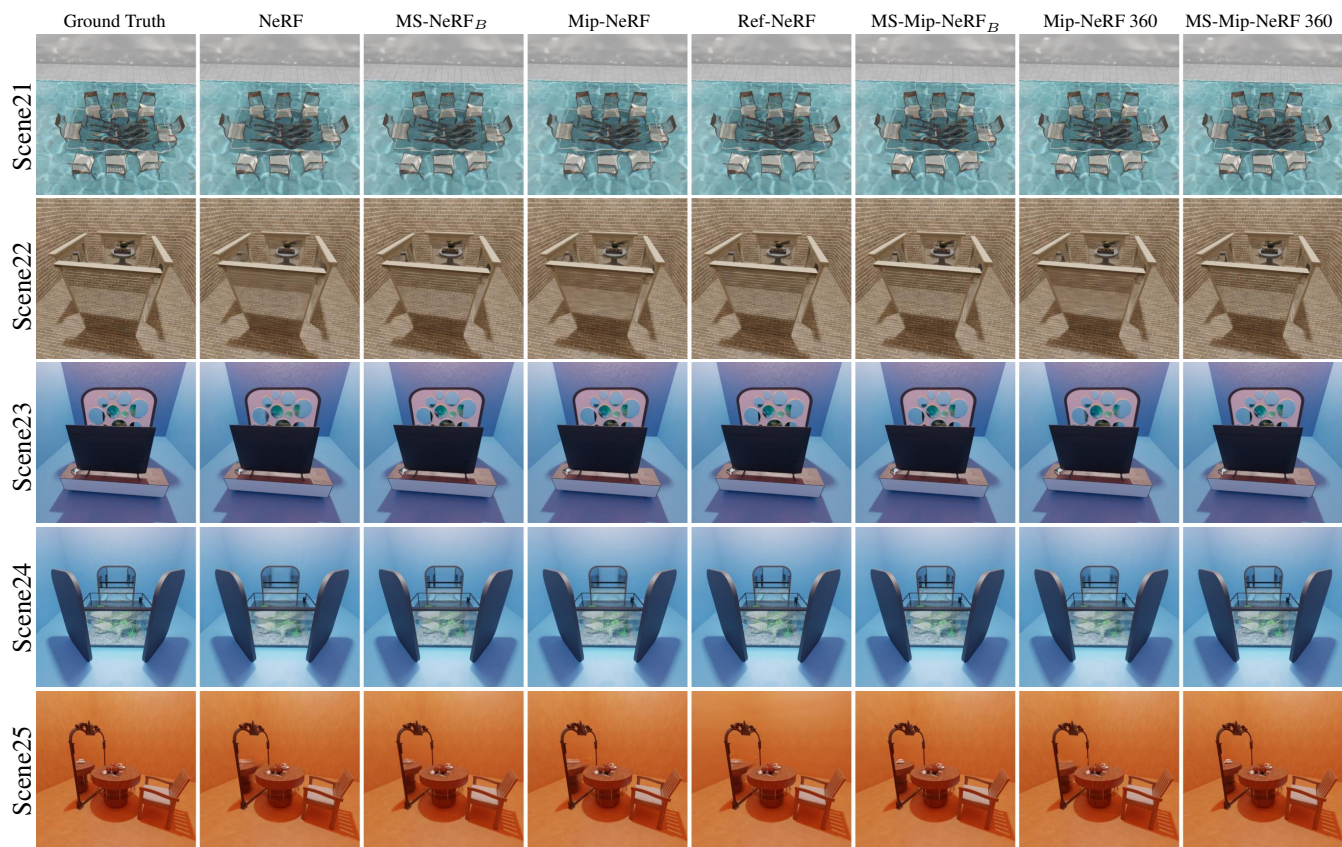

(c) Visual comparisons on Scene21~Scene25. Please zoom in to see the details.

Figure 7. We randomly visualize one test view for each scene in our synthetic dataset.

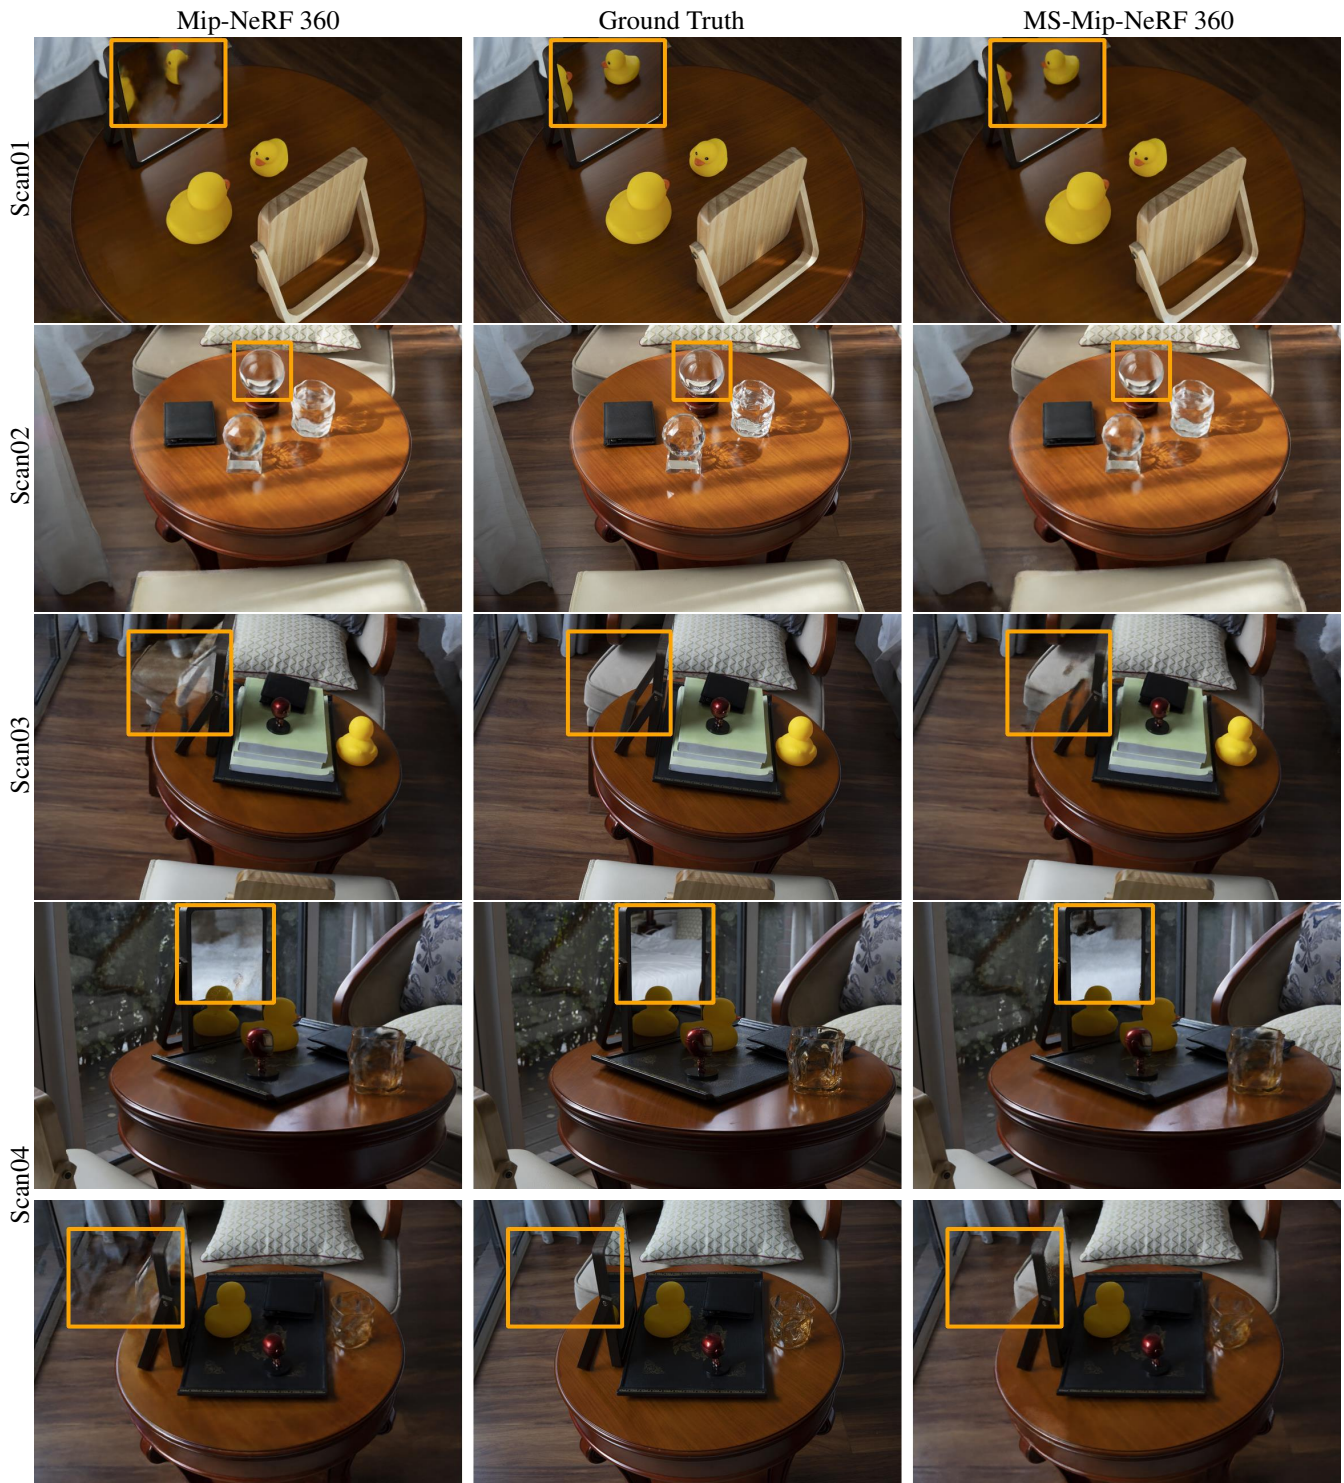

(a) Visual comparisons on Scan01~Scan04.

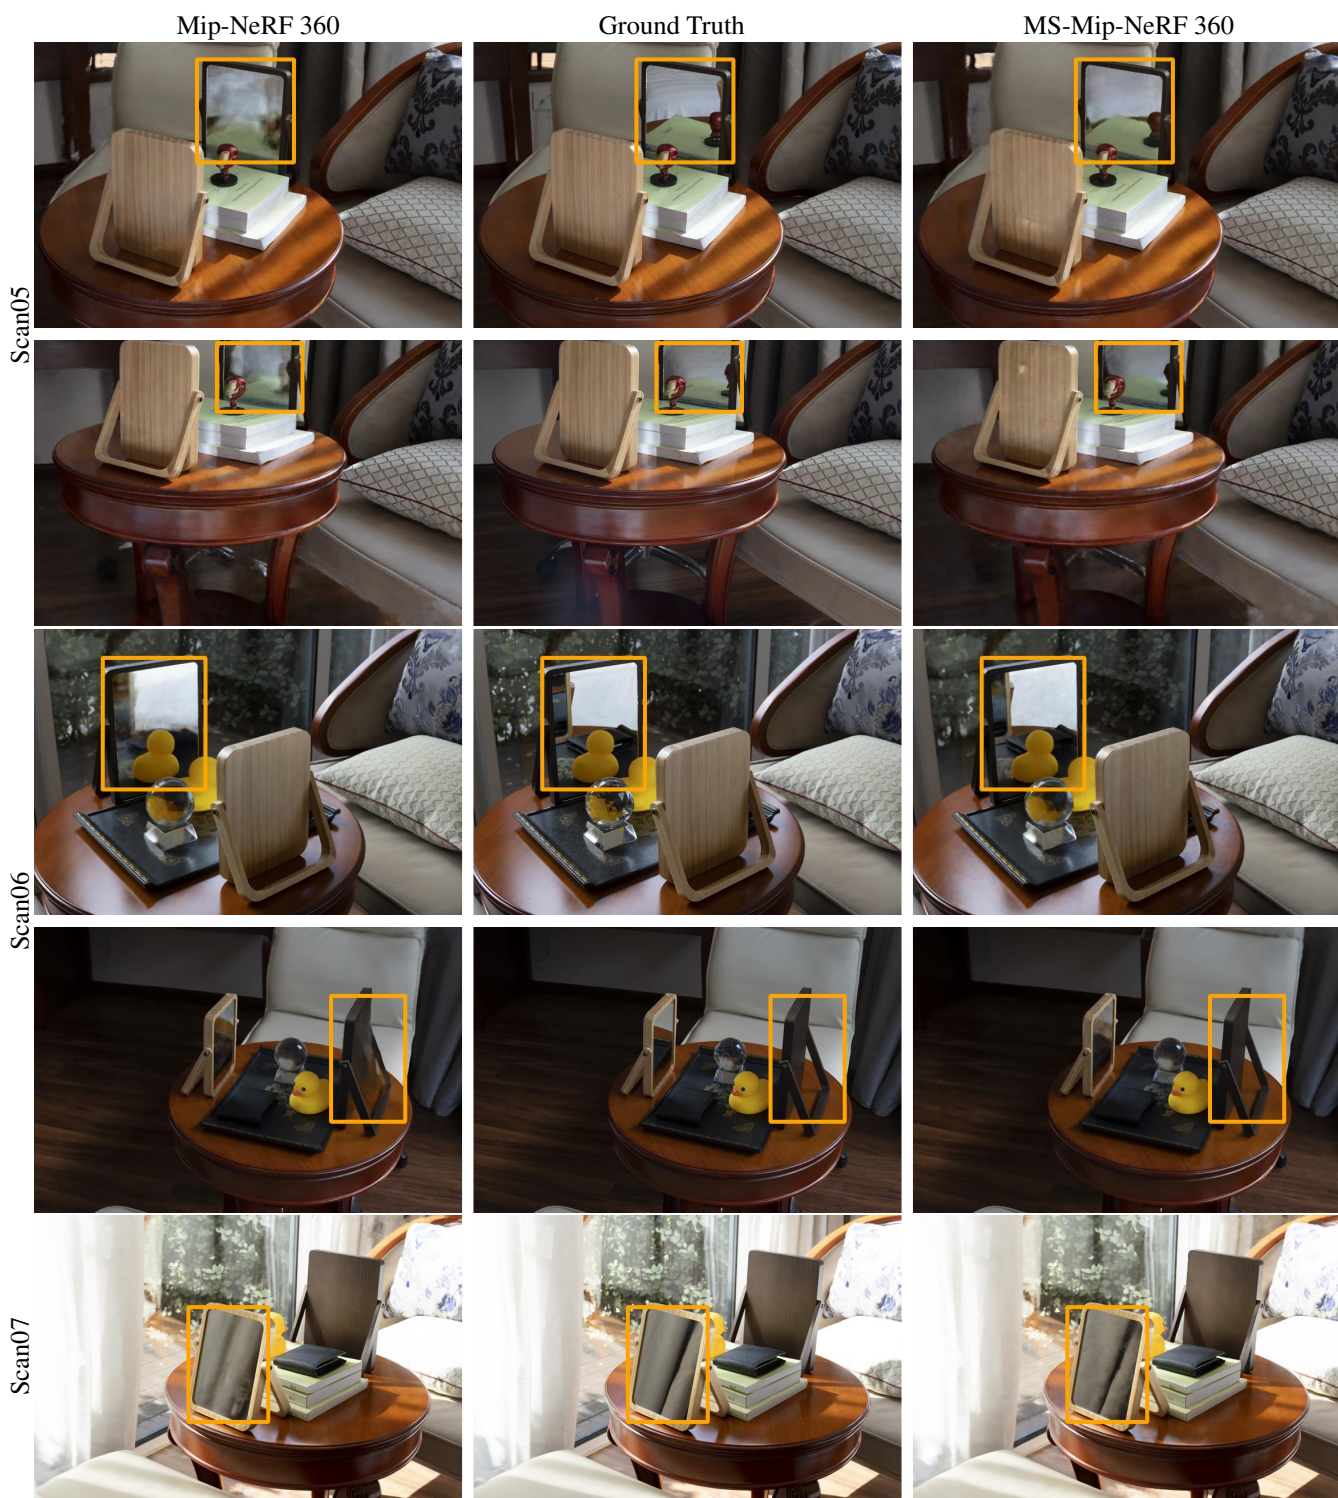

(b) Visual comparisons on Scan05~Scan07.

Figure 8. We visualize 1~2 test view(s) for each scene in our real captured dataset.

## References

- [1] Jonathan T Barron, Ben Mildenhall, Matthew Tancik, Peter Hedman, Ricardo Martin-Brualla, and Pratul P Srinivasan. Mip-nerf: A multiscale representation for anti-aliasing neural radiance fields. In *ICCV*, pages 5855–5864, 2021. 1, 2
- [2] Jonathan T Barron, Ben Mildenhall, Dor Verbin, Pratul P Srinivasan, and Peter Hedman. Mip-nerf 360: Unbounded anti-aliased neural radiance fields. In *IEEE CVPR*, pages 5470–5479, 2022. 1, 2
- [3] Blender Online Community. *Blender - a 3D modelling and rendering package*. Blender Foundation, Stichting Blender Foundation, Amsterdam, 2022. 2
- [4] William Falcon and The PyTorch Lightning team. Pytorch lightning, 3 2019. 2
- [5] Yuan-Chen Guo, Di Kang, Linchao Bao, Yu He, and Song-Hai Zhang. Nerfren: Neural radiance fields with reflections. In *IEEE CVPR*, pages 18409–18418, 2022. 2, 4
- [6] Diederik P Kingma and Jimmy Ba. Adam: A method for stochastic optimization. *arXiv preprint arXiv:1412.6980*, 2014. 2
- [7] Alex Krizhevsky, Ilya Sutskever, and Geoffrey E Hinton. Imagenet classification with deep convolutional neural networks. *Communications of the ACM*, 60(6):84–90, 2017. 2
- [8] Ben Mildenhall, Pratul P Srinivasan, Rodrigo Ortiz-Cayon, Nima Khademi Kalantari, Ravi Ramamoorthi, Ren Ng, and Abhishek Kar. Local light field fusion: Practical view synthesis with prescriptive sampling guidelines. *ACM TOG*, 38(4):1–14, 2019. 2
- [9] Ben Mildenhall, Pratul P Srinivasan, Matthew Tancik, Jonathan T Barron, Ravi Ramamoorthi, and Ren Ng. Nerf: Representing scenes as neural radiance fields for view synthesis. *Communications of the ACM*, 65(1):99–106, 2021. 1, 2, 3
- [10] Ben Mildenhall, Dor Verbin, Pratul P. Srinivasan, Peter Hedman, Ricardo Martin-Brualla, and Jonathan T. Barron. MultiNeRF: A Code Release for Mip-NeRF 360, Ref-NeRF, and RawNeRF, 2022. 2
- [11] Adam Paszke, Sam Gross, Francisco Massa, Adam Lerer, James Bradbury, Gregory Chanan, Trevor Killeen, Zeming Lin, Natalia Gimelshein, Luca Antiga, et al. Pytorch: An imperative style, high-performance deep learning library. *Advances in neural information processing systems*, 32, 2019. 2
- [12] Johannes L Schonberger and Jan-Michael Frahm. Structure-from-motion revisited. In *IEEE CVPR*, pages 4104–4113, 2016. 3
- [13] Dor Verbin, Peter Hedman, Ben Mildenhall, Todd Zickler, Jonathan T. Barron, and Pratul P. Srinivasan. Ref-NeRF: Structured view-dependent appearance for neural radiance fields. *CVPR*, 2022. 2
- [14] Zhou Wang, Alan C Bovik, Hamid R Sheikh, and Eero P Simoncelli. Image quality assessment: from error visibility to structural similarity. *IEEE transactions on image processing*, 13(4):600–612, 2004. 2
- [15] Lin Yen-Chen. Nerf-pytorch. <https://github.com/yenchenlin/nerf-pytorch/>, 2020. 2
- [16] Richard Zhang, Phillip Isola, Alexei A Efros, Eli Shechtman, and Oliver Wang. The unreasonable effectiveness of deep features as a perceptual metric. In *IEEE CVPR*, pages 586–595, 2018. 2
